# Supplementary material for: Proteomic and Machine Learning Signatures of Rabies Virus Infection Reveal Stage-Specific Biomarkers
Source: Research Square preprint supplement (doi:10.21203/rs.3.rs-7652543/v1), 2025-10-15
Supplement: Supplementary file 1 [file 28ea46a2c5f157f572501c38.docx]

**Supplementary Table S1.** Stepwise filtering of proteins for statistical analysis

| Filtering step | Number of proteins retained | Criteria applied |
| --- | --- | --- |
| Initial identifications | 3,847 | All proteins identified with ≥1 peptide |
| Quality filtering | 2,950 | ≥2 unique peptides, coverage ≥20%, score ≥500 |
| Missingness filtering | 1,601 | Present in ≥50% of samples in at least one group |
| Differential testing | 134 | Significant by limma-voom, FDR ≤ 0.05 |
| Final selection | 27 | High-confidence candidates retained for downstream ML and network analysis |
